# Supplementary material for: Transformation of microcystins to 2-methyl-3-methoxy-4-phenylbutyric acid by room temperature ozone oxidation for rapid quantification of total microcystins
Source: Royal Society of Chemistry journal article supplement (doi:10.1039/c5em00588d), 2016-01-01
Supplement: c5em00588d1.pdf [file c5em00588d1.pdf]

1. Fig.S1.

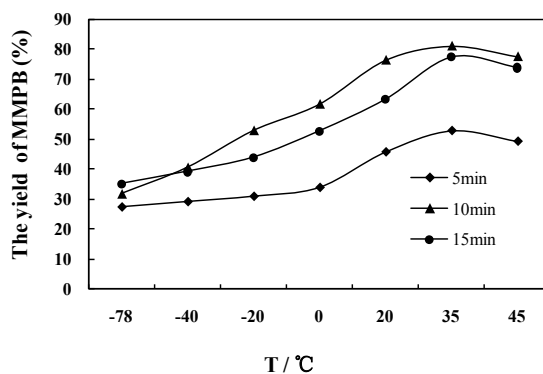

Fig.S1. Effect of reaction temperature on the yield of MMPB

2. Fig.S2.

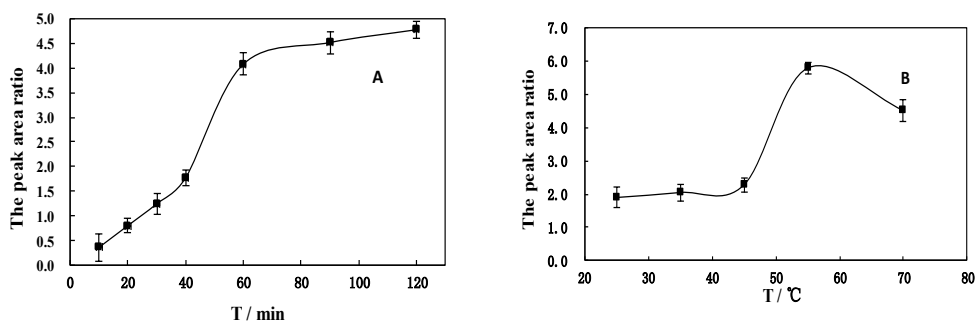

Fig.S2. Peak area ratio of the target compound, MMPB-OCH<sub>3</sub> and 4-PB-OCH<sub>3</sub>. The reaction adopts 14% BF<sub>3</sub>-methanol as the derivatization reagent, as influenced by: (A) Reaction time. (B) Reaction temperatures (ranging from 25 to 70°C).

3. Results about intraday and interday precisions

Precision (intraday/interday) was expressed as the percentage relative standard deviation (RSD), and was then evaluated using concentrations of 30 µg L<sup>-1</sup>, 100 µg L<sup>-1</sup> of MCs. The solutions were spiked in lake water samples, we repeated the analysis 4 times on different days (n=4)

Table S1 Results of precision

| Concentration (µg L <sup>-1</sup> ) | Measured | Intraday RSD (%) | Interday RSD (%) |
|-------------------------------------|----------|------------------|------------------|
| 30                                  | 23.8     | 4.3              | 6.7              |
| 100                                 | 80.2     | 6.5              | 8.7              |
